# Supplementary material
Source: PubMed Central journal article supplement (PMC8581762)
Supplement: HEP-72-1541-s001.pdf [file HEP-72-1541-s001.pdf]

## **Supplementary Figures**

## A Patients included in the pre and post DAA analysis

| N    | Geno | Cirrhosis present | Previous Treatment | Current Treatment | HCV PCR negative | 1 <sup>st</sup> Timepoint | 2 <sup>nd</sup> timepoint | HLADR      | Best association tetramer/allele |
|------|------|-------------------|--------------------|-------------------|------------------|---------------------------|---------------------------|------------|----------------------------------|
| 261  | 1b   | Y                 | IFN, PI            | S+L+riba          | TW4              | 3mth pre                  | 3mth post                 | DRB1*01,03 | 14                               |
| 383  | 1    | Y                 | IFN                | S+L+riba          | TW8              | 11mth pre                 | 1mth post                 | DRB1*07    | 24                               |
| 402  | 1    | Y                 | IFNx2, PI          | S+L+riba          | TW6              | 7mth pre                  | 3mth post                 | DRB1*01    | 14                               |
| 890  | 1    | Y                 | IFN                | S+L+riba          | TW4              | 6mth pre                  | 1mth post                 | DRB1*03,07 | 24                               |
| 895  | 1b   | Y                 | IFNx2, PI          | S+L+riba          | TW8              | 1mth pre                  | 3mth post                 | DRB1*15    | 17,18,19                         |
| 913  | 1a   | Y                 | IFN                | S+L+riba          | TW8              | 6mth pre                  | 3mth post                 | DRB1*04,15 | 17,18,19                         |
| 996  | 1    | Y                 | IFNx2, PI          | S+L+riba          | TW4              | 12mth pre                 | 1mth post                 | DRB1*04    | 15,20,21                         |
| 1119 | 1a   | Y                 | Nil                | S+L+riba          | TW4              | 12mth pre                 | 1mth post                 | DRB1*01    | 14                               |
| 191  | 1    | Y                 | IFNx2, PI          | S+L+riba          | TW4              | 4mth pre                  | 6mth post                 | DRB1*07    | 24                               |
| 185  | 3    | N                 | Nil                | S+L+riba          | TW8              | 48mth pre                 | 0mth post(EOT)            | DRB1*07,15 | 17,18,19                         |
| 202  | 1b   | N                 | IFN                | O+P+R+D           | TW8              | 0mth pre(SOT)             | 0mth post(EOT)            | DRB1*07    | 24                               |
| 722  | 3    | Y                 | IFN                | S+V               | TW8              | 0mth pre(SOT)             | 0mth post(EOT)            | DRB1*01,15 | 14                               |
| 736  | 3    | N                 | IFN                | S+IFN+riba        | TW8              | 6mth pre                  | 3mth post                 | DRB1*03,15 | 17,18,19                         |
| 820  | 1b   | N                 | IFN                | S+L+riba          | TW8              | 0mth pre(SOT)             | 0mth post(EOT)            | DRB1*04    | 15,20,21                         |
| 950  | 1a   | N                 | Nil                | S+L+riba          | TW8              | 0mth pre(SOT)             | 1mth post                 | DRB1*04    | 15,20,21                         |
| 984  | 1a   | N                 | IFN                | S+L+riba          | TW4              | 0mth pre(SOT)             | 0mth post(EOT)            | DRB1*01    | 14                               |
| 1164 | 1    | Y(T)              | Nil                | S+L+riba          | TW4              | 6mth pre                  | 0mth post(EOT)            | DRB1*03,04 | 15,20,21                         |
| 1215 | 3a   | YN                | IFN                | S+IFN+riba        | TW4              | 6mth pre                  | 3mth post                 | DRB1*04    | 15,20,21                         |
| 238  | 3    | N                 | IFN                | S+IFN+riba        | TW4              | 1mth pre                  | 0mth post(EOT)            | DRB1*03,07 | 24                               |
| 780  | 1    | Y                 | IFN, PI            | S+L+riba          | TW8              | 6mth pre                  | 3mth post                 | DRB1*15    | 17,18,19                         |
| 1087 | 3    | N                 | IFNx2              | S+V               | TW2              | 12 mth pre                | 3 mth post                | DRB1*07    | 24                               |

## B Chronic HCV patients included in the phenotypic analysis (Surface and TF markers)

| N     | Geno | Cirrhosis present | HLADR      | Best association tetramer/allele |
|-------|------|-------------------|------------|----------------------------------|
| 1065  | 1b   | Y                 | DRB1*01,15 | 14                               |
| 876   | 1a   | Y                 | DRB1*07    | 24                               |
| 1262  | 1b   | Y(T)              | DRB1*01    | 14                               |
| 638   | 1a   | Y                 | DRB1*04,07 | 24                               |
| 1247  | 1a   | Y                 | DRB1*07    | 24                               |
| 648   | 1    | na                | DRB1*15    | 17,18,19                         |
| 1254  | 1a   | Y(T)              | DRB1*15    | 17,18,19                         |
| 127   | 1    | N                 | DRB1*04,07 | 24                               |
| 191   | 1    | Y                 | DRB1*07    | 24                               |
| 402°  | 1    | Y                 | DRB1*01    | 14                               |
| 736°  | 3    | N                 | DRB1*03,15 | 17,18,19                         |
| 890°  | 1    | Y                 | DRB1*03,07 | 24                               |
| 1164° | 1    | Y(T)              | DRB1*03,04 | 15,20,21                         |
| 261°  | 1b   | Y                 | DRB1*01,03 | 14                               |
| 820°  | 1b   | N                 | DRB1*04    | 15,20,21                         |
| 913°  | 1a   | Y                 | DRB1*04,15 | 17,18,19                         |
| 950°  | 1a   | N                 | DRB1*04    | 15,20,21                         |
| 996°  | 1    | Y                 | DRB1*04    | 15,20,21                         |
| 202°  | 1b   | N                 | DRB1*07    | 24                               |
| 984°  | 1a   | N                 | DRB1*01    | 14                               |

### C Vaccine volunteers (*ex-vivo*)

| Trial number             | Prime | Boost | EOT  | HLA-DR       | Tetramer               |
|--------------------------|-------|-------|------|--------------|------------------------|
| HCV003333 <sup>^^</sup>  | TW2   | TW9   | TW32 | DRB1*01      | 14                     |
| HCV003335 <sup>^^</sup>  | TW2   | TW12  | TW32 | DRB1*04, *15 | 15, 17, 18, 19, 20, 21 |
| HCV003343 <sup>^</sup>   | TW2   | TW12  | TW34 | DRB1*01      | 14                     |
| HCV003345 <sup>^</sup>   | TW2   | TW9   | TW34 | DRB1*04, *15 | 15, 17, 18, 19, 20, 21 |
| HCV003347 <sup>**</sup>  | TW4   | TW12  | TW34 | DRB1*15      | 17, 18, 19             |
| HCV003374 <sup>***</sup> | TW4   | TW9   | TW34 | DRB1*01      | 14                     |
| PEA-04009                | TW2   | TW9   | TW34 | DRB1*01      | 14                     |
| PEA-04011                | TW4   | TW12  | TW34 | DRB1*15      | 17, 18, 19             |
| PEA-04014                | TW2   | TW9   | TW34 | DRB1*15      | 17, 18, 19             |
| PEA-04028                | TW2   | TW9   | TW34 | DRB1*15      | 17, 18, 19             |

### D Vaccine volunteers (*in vitro*)

| Trial number           | Time point | Vaccination schedule                 | HLA-DR       | Tetramer               |
|------------------------|------------|--------------------------------------|--------------|------------------------|
| HCV003333 <sup>^</sup> | TW9        | AdCh3 (TW0) / MVA (TW8)              | DRB1*01      | 14                     |
| HCV003335 <sup>^</sup> | TW12       | AdCh3 (TW0) / MVA (TW8)              | DRB1*04, *15 | 15, 17, 18, 19, 20, 21 |
| HCV003337 <sup>^</sup> | TW32       | AdCh3 (TW0) / MVA (TW8)              | DRB1*04      | 15, 20, 21             |
| HCV003339              | TW48       | AdCh3 (TW0) / MVA (TW8) / MVA (TW40) | DRB1*07      | 22, 24, 29             |
| HCV003343              | TW18       | AdCh3 (TW0) / MVA (TW8) / MVA (TW40) | DRB1*01      | 14                     |

### E Spontaneous resolvers individuals

| Cohort number | Year of HCV Transmission | HLA-DR       | Tetramer               |
|---------------|--------------------------|--------------|------------------------|
| SR3           | Unknown                  | DRB1*01, *04 | 14, 15, 20, 21         |
| SR4           | 1980's                   | DRB1*03, *15 | 17, 18, 19             |
| SR8           | Unknown                  | DRB1*07      | 22, 27, 29             |
| SR9           | 1970's                   | DRB1*07      | 22, 27, 29             |
| SR10          | 1980's                   | DRB1*15      | 17, 18, 19             |
| SR11          | Unknown                  | DRB1*04      | 15, 20, 21             |
| SR13          | Unknown                  | DRB1*15      | 17, 18, 19             |
| SR14          | 2000's                   | DRB1*07, *15 | 17, 18, 19, 22, 27, 29 |
| SR16          | 1990's                   | DRB1*01, *07 | 14, 22, 27, 29         |
| SR17          | 1990's                   | DRB1*15      | 17, 18, 19             |

#### Supplementary Figure 1: List of participants in three analysed cohorts.

A) Characteristics of patients included in pre and post DAA analysis. N=cohort number, Geno=genotype, Y=yes, N=no, T0=liver transplant, IFN= interferon therapy, Riba=oral ribavirin, PI= protease inhibitor (telaprevir, boceprevir), S=sofosbuvir, L=ledipasvir, V=velpatasvir, O=ombitasvir, P=paritaprevir, R=ritonavir, D=dasabuvir. TW=treatment week, EOT= end of treatment, SOT=start of treatment.

B) Chronic HCV patients included in the phenotypic analysis. ° indicates that some patients included in the table B subsequently received a DAA treatment and are also included in table A, N/A= not available.

C) Vaccine trial volunteers used in *ex-vivo* tetramer analysis. Healthy volunteers vaccinated with AdCh3 NSmut1  $2.5 \times 10^{10}$  vp (prime vaccine) and MVA-NSmut  $2 \times 10^8$  pfu,  $2 \times 10^7$  pfu (\*\*\*) or  $2 \times 10^6$  pfu (\*\*) (boost vaccine). ^volunteers received an additional MVA at week 40. ^^volunteers received an additional round of AdCh3/MVA 21 months earlier

*(HCV003333) and 11 months earlier (HCV003335). Note 'baseline' in these samples was prior to first vaccination round.*

*D) Vaccine trial volunteers used in in-vitro cell line analysis. Healthy volunteers vaccinated with AdCh3/MVA as per above schedule. ^volunteers received previous vaccination with AdCh3/MVA 21 months prior (HCV003333) and 11 months prior (HCV003335, HCV003337).*

*E) Characteristics of individuals with spontaneous HCV clearance. Volunteers recruited based on being HCV antibody positive, HCV PCR negative, the absence of previous HCV treatment and HLA matching to the MHC Class II tetramer panel*

**A**

| N  | Protein | Position  | Peptide Sequence      | HLA restriction |
|----|---------|-----------|-----------------------|-----------------|
| 14 | NS4b    | 1806-1818 | TLLFNILGGWVAA         | DRB1*0101       |
| 15 | NS3     | 1248-1262 | GYKVLVLNPSVAATL       | DRB1*0401       |
| 17 | NS3     | 1582-1597 | NFPYLVAYQATVCARA      | DRB1*1501       |
| 18 | NS3     | 1411-1425 | GINAVAYYRGLDVSV       | DRB1*1501       |
| 19 | NS3     | 1535-1551 | TTVRLRAYMNTPLPVC      | DRB1*1501       |
| 20 | NS4b    | 1771-1790 | SGIQYLAGLSTLPGNPAIASL | DRB1*0401       |
| 21 | NS4b    | 1773-1790 | QYLAGLSTLPGNPAIASL    | DRB1*0404       |
| 22 | NS2     | 794-810   | WPLLLLLLALPQRAYAQ     | DRB1*0701       |
| 24 | NS3     | 1535-1551 | TTVRLRAYMNTPLPVC      | DRB1*0701       |
| 25 | NS5b    | 66-81     | VYYLTRDPTPLARAA       | DRB1*0301       |
| 29 | NS5a    | 1957-1975 | SLTITSLRRHNWITSCS     | DRB1*0701       |

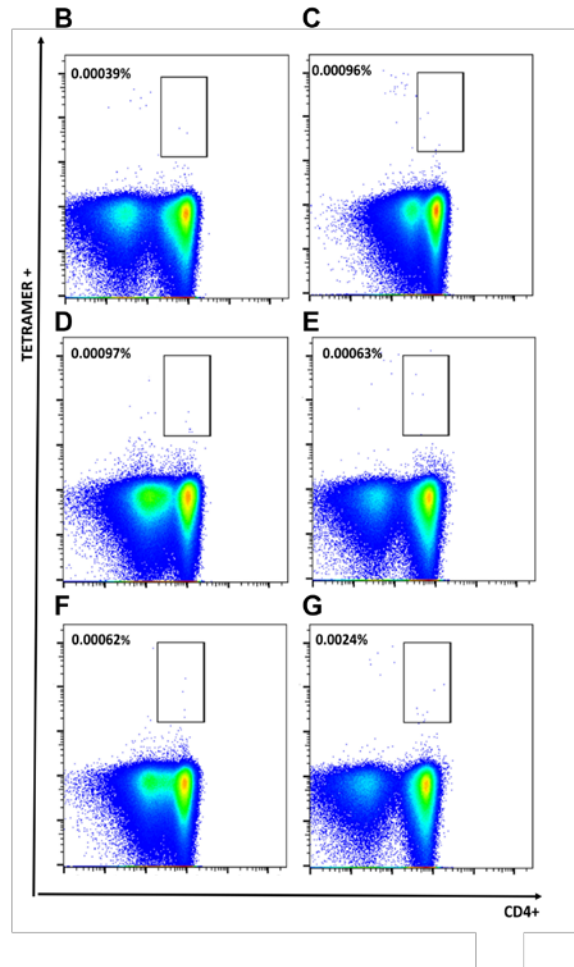

**Supplementary Figure 2: List of MHC class II tetramers**

A) List of MHC class II tetramers encoding immunodominant epitopes IN NS region restricted for specific HLA type. Assigned tetramer number (N), sequence and HLA specificity. B) MHC class II tetramer 14- HLA matched; C) MHC class II tetramer 14- HLA mismatched; D) MHC class II tetramer 17- HLA matched; E) MHC class II tetramer 17- HLA mismatched; F) MHC class II tetramer 24- HLA matched; G) MHC class II tetramer 24- HLA mismatched.

| Antibody                                   | Fluorochrome | Concentration | Clone    |
|--------------------------------------------|--------------|---------------|----------|
| <b>Cell surface and intranuclear panel</b> |              |               |          |
| CD3                                        | BV570        | 1:100         | UCHT1    |
| CD4                                        | AF700        | 1:100         | RPA-T4   |
| CD127                                      | PB           | 1:100         | A019D5   |
| CD28                                       | PerCP-Cy5.5  | 1:50          | CD28.2   |
| CCR7                                       | PE-Cy7       | 1:50          |          |
| CD45RA                                     | APC          | 1:50          | HI100    |
| CD14                                       | APC-Cy7      | 1:100         | HCD14    |
| CD19                                       | APC-Cy7      | 1:100         | HIB19    |
| Tbet                                       | PerCP-Cy5.5  | 1:50          | eBio4B10 |
| Eomes                                      | PE-Cy7       | 1:50          | WD1928   |
| Tetramer                                   | PE           | 1:100         |          |
| Live dead                                  | APC-Cy7      | 1:1000        |          |
| <b>ICS Panel</b>                           |              |               |          |
| CD3                                        | BV570        | 1:100         | UCHT1    |
| CD4                                        | BV421        | 1:100         | OKT4     |
| CD8                                        | PerCP-Cy5.5  | 1:100         | SK1      |
| IFN- $\gamma$                              | AF700        | 1:50          | B27      |
| TNF- $\alpha$                              | PE-Cy7       | 1:25          |          |
| IL-2                                       | APC          | 1:25          |          |
| MIP-1 $\beta$                              | PE           | 1:50          |          |
| Live/dead                                  | APC-Cy7      | 1:1000        |          |

**Supplementary Figure 3: List of antibodies used in FACS experiments**

**A**

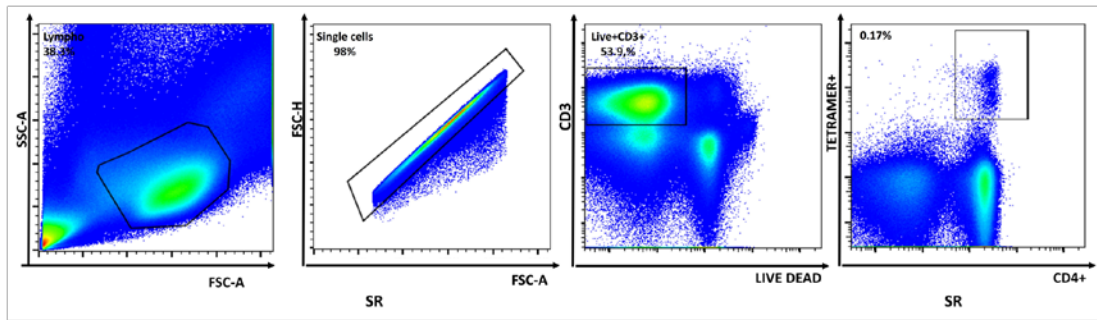

**B**

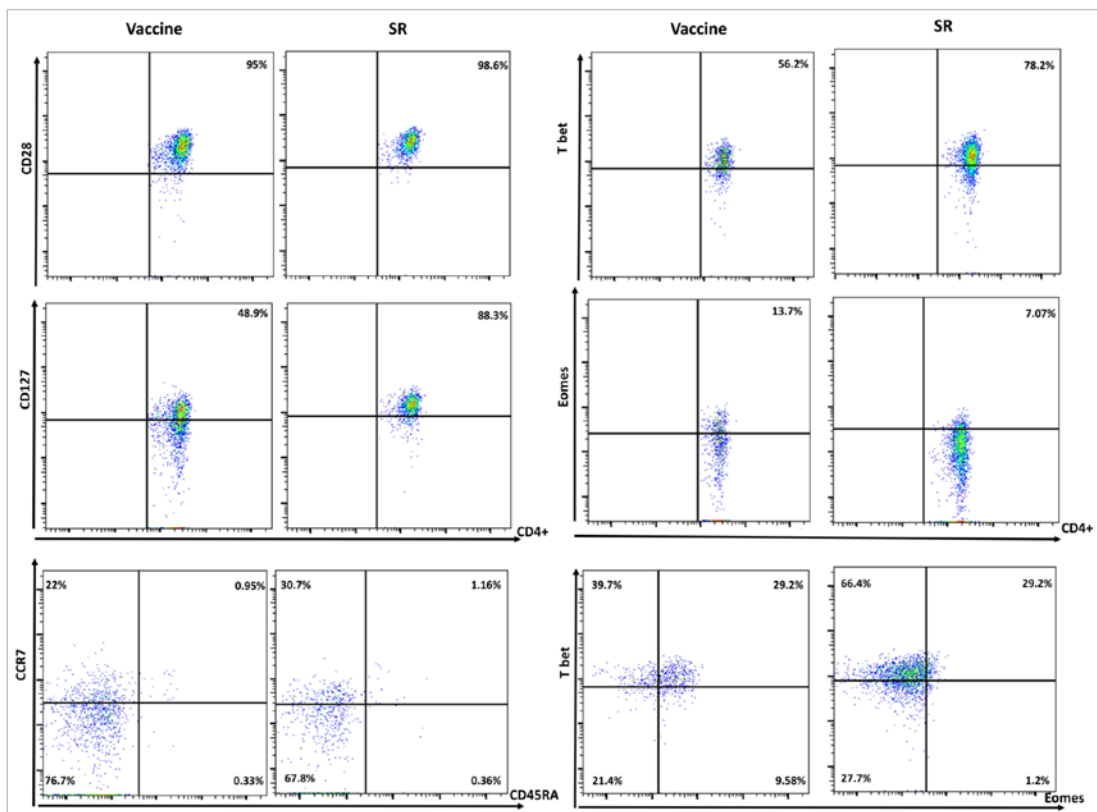

**Supplementary Figure 4: FACS plot surface and intranuclear markers on tetramer + CD4+ T cells.**

*A) Gating strategy used to identify MHC Class II tetramer positive CD4+ T cells.*

*B) Example gating of cell surface and intranuclear markers used in vaccine (left column) at boost and SR (right column) samples.*

**A Comparison of tetramer positive CD4+ T cells pre-DAA vs post-DAA therapy**

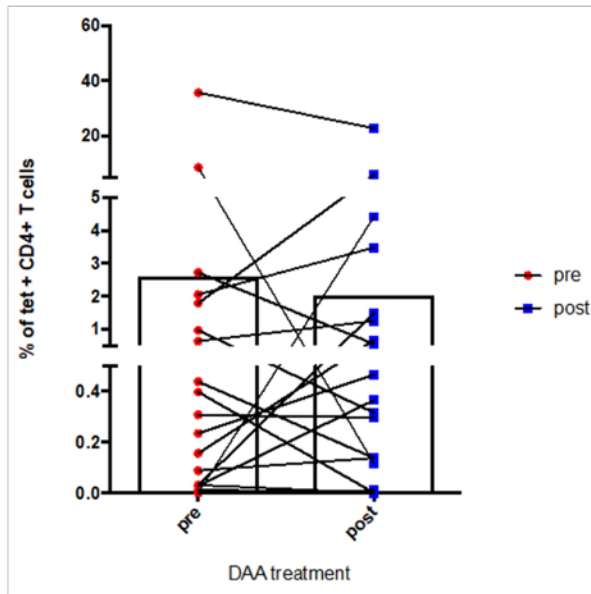

**B Subgroup analysis of patients with >2-fold increase of tetramer positive CD4+ T cells vs <2-fold increase following DAA mediated HCV cure**

|                   | <2-fold increase | >2-fold increase | P-value |
|-------------------|------------------|------------------|---------|
| Age (average)     | 58.6y            | 60.6y            | p=NS    |
| Genotype 1        | 9 (70%)          | 6 (75%)          | p=NS    |
| Genotype 3        | 4 (30%)          | 2 (25%)          | p=NS    |
| Cirrhosis present | 6 (46%)          | 6 (75%)          | p=NS    |
| Neg RNA <8 wks    | 5 (41%)          | 6 (75%)          | p=NS    |
| Tbet              | 0.95             | -0.53            | p=NS    |
| Eomes             | -2.3             | -1.61            | p=NS    |
| PD-1              | 1.1              | 2.7              | p=NS    |
| Foxp3             | -0.74            | 0.47             | p=NS    |

**C Subgroup analysis of patients with >2-fold decrease of tetramer positive CD4+ T cells vs <2-fold decrease following DAA mediated HCV cure**

|                   | <2-fold decrease | >2-fold decrease | P-value |
|-------------------|------------------|------------------|---------|
| Age (average)     | 59.3y            | 59.3y            | p=NS    |
| Genotype 1        | 11 (73%)         | 4 (66%)          | p=NS    |
| Genotype 3        | 4 (27%)          | 2 (33%)          | p=NS    |
| Cirrhosis present | 9 (60%)          | 3 (50%)          | p=NS    |
| Neg RNA <8 wks    | 8 (53%)          | 3 (50%)          | p=NS    |
| Tbet              | -0.45            | 1.7              | p=NS    |
| Eomes             | -0.7             | -3.83            | p=NS    |
| PD-1              | -0.47            | -2.92            | p=NS    |
| Foxp3             | -0.16            | -0.89            | p=NS    |

**Supplementary Figure 5 – DAA subgroup analysis**

A) PBMC's cultured with peptide matching tetramer sequence for 14 days. Pre = pre-DAA therapy (red circles), post = post-DAA therapy (blue squares). Mean shown.  
 B-C) PD-1, Tbet, Eomes and Foxp3 represented as change in expression in post-DAA – pre-DAA for individual samples, with average of individual sample changes represented. Unpaired T-tests used for significance testing.



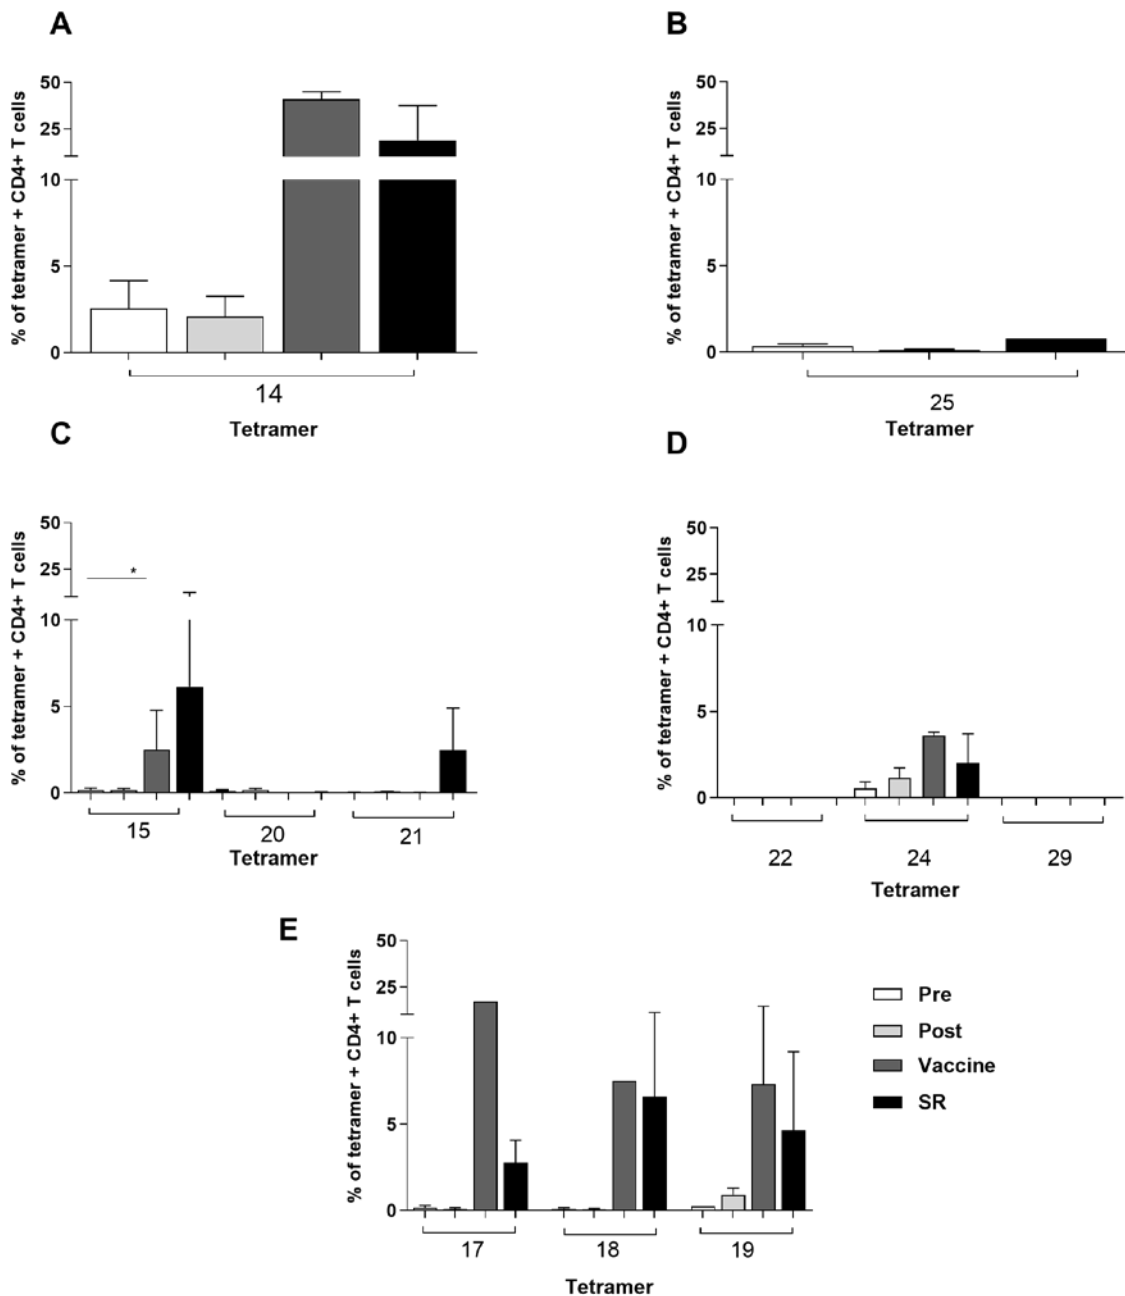

**Supplementary Figure 6: Comparison of individual tetramer magnitude following culture.**

PBMC derived from patients undergoing DAA treatment (pre-DAA = white bar, post-DAA = light grey bar), SR individuals (black bar) and vaccinated volunteers (dark grey bar). PBMCs were cultured for 14 days with peptide corresponding to tetramer sequence. Individuals tetramers are represented by HLA Class II restriction. A) DRB1\*01 restricted tetramer14 (NS3<sub>1806-1818</sub>), B) DRB1\*03 restricted tetramer 25 (NS5b<sub>66-81</sub>), C) DRB1\*04 restricted tetramer 15 (NS3<sub>1248-1263</sub>), 20 (NS4b<sub>1771-1790</sub>) and 21 (NS4b<sub>1775-1790</sub>), D) DRB1\*07 restricted tetramer 22 (NS2<sub>794-810</sub>), 24 (NS3<sub>1535-1551</sub>) and 29 (NS5a<sub>1957-1957</sub>), E) DRB1\*15 restricted tetramer 17 (NS3<sub>1582-1597</sub>), tetramer 18 (NS3<sub>1411-1425</sub>) and tetramer 19 (NS3<sub>1535-</sub>

1551). Error bars represent the standard error of mean (SEM). Only statistically differences are shown.

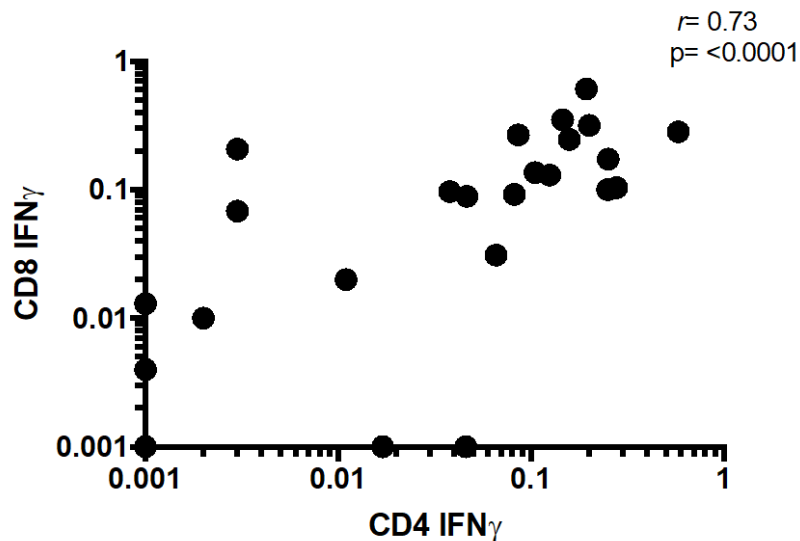

**Supplementary Figure 7: Correlation of CD4+ and CD8+ IFN $\gamma$  production in vaccine induced HCV specific T cells**

*Frozen PBMCs were cultured overnight with peptide and ICS analysis performed. IFN $\gamma$  production was measured at different time points following vaccination (following prime vaccination, boost vaccination and end of trial – note values not separated by time). Pearson correlation performed. (results derived from Hartnell et al, Front Immunol 2018)*
